# Supplementary material
Source: MDPI journal article supplement (https://www.mdpi.com/2306-5729/4/2/89)
Supplement: s1 [file s1]

I. Wei Ren, Exploring properties in reduced Collatz dynamics, IEEE Dataport, 2018.  http://dx.doi.org/10.21227/ge9h-8a77 (2018).
II. Wei Ren, Verifying whether extremely large integer guarantees Collatz conjecture (can return to 1 finally), IEEE Dataport, http://dx.doi.org/10.21227/fs3z-vc10 (2018). 
III. Wei Ren, Exploring the ratio between the count of x/2 and the count of (3*x+1)/2 in original dynamics for extremely large starting integers asymptotically, IEEE Dataport. http://dx.doi.org/10.21227/rxx6-8322 (2018).
IV. Wei Ren, Exploring the inverse mapping from a dynamics to a residue class - inputting a reduced dynamics or partial dynamics and outputting a residue class, IEEE Dataport. http://dx.doi.org/10.21227/qmzw-gn71 (2018).
V. Wei Ren, Reduced Collatz Dynamics for Integers from 3 to 999999, IEEE Dataport. http://dx.doi.org/10.21227/hq8c-x340 (2018). 
VI. Wei Ren, Collatz Automata and Compute Residue Class from Reduced Dynamics by Formula, IEEE Dataport. http://dx.doi.org/10.21227/7z84-ms87 (2018).
